# Supplementary material for: Comprehensive Genome Analysis of Carbapenemase-Producing Enterobacter spp.: New Insights into Phylogeny, Population Structure, and Resistance Mechanisms
Source: PubMed Central journal article supplement (PMC5156309; doi:10.1128/mbio.02093-16), 2016-12-13
Supplement: mbo006163111sf2.pdf [file mbo006163111sf2.pdf]

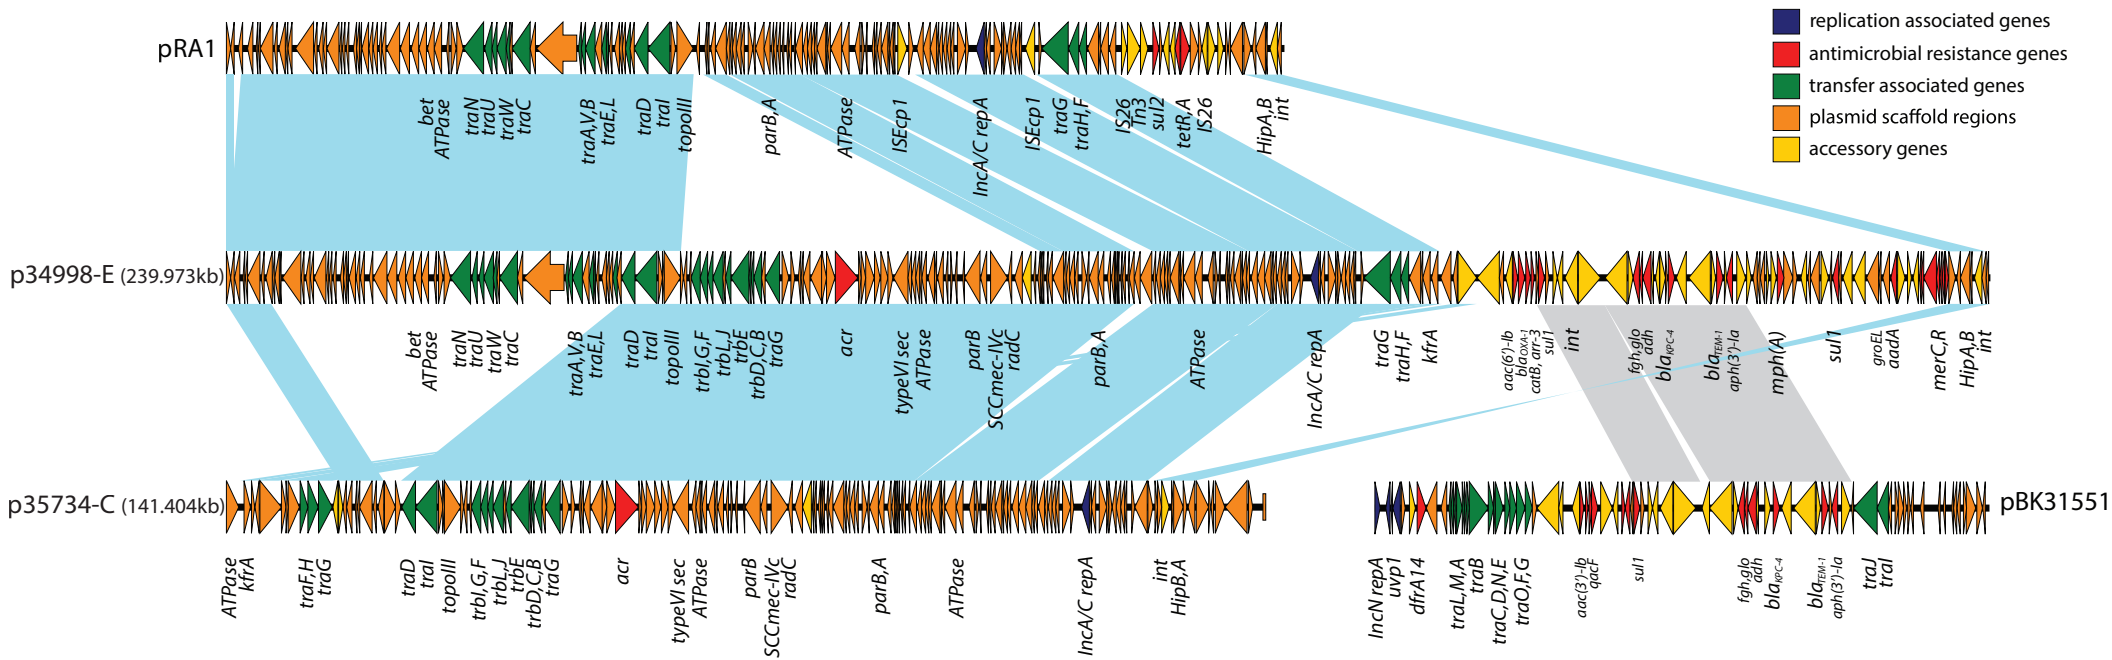

**Figure S2: Comparison of *bla*<sub>KPC-4</sub> harboring plasmid from BK34998.**

The light-blue shading denotes regions of IncA/C plasmid backbone shared among three plasmids, pRA1, p34998-E, and p35734-C. Light-gray shading denotes region of homology surrounding *bla*<sub>KPC-4</sub> from an IncN plasmid pBK31551. ORFs are symbolized by arrows and colored based on the predicted gene function (see key, top right).
