# Supplementary material for: Comprehensive Genome Analysis of Carbapenemase-Producing Enterobacter spp.: New Insights into Phylogeny, Population Structure, and Resistance Mechanisms
Source: PubMed Central journal article supplement (PMC5156309; doi:10.1128/mbio.02093-16), 2016-12-13
Supplement: mbo006163111sf3.pdf [file mbo006163111sf3.pdf]

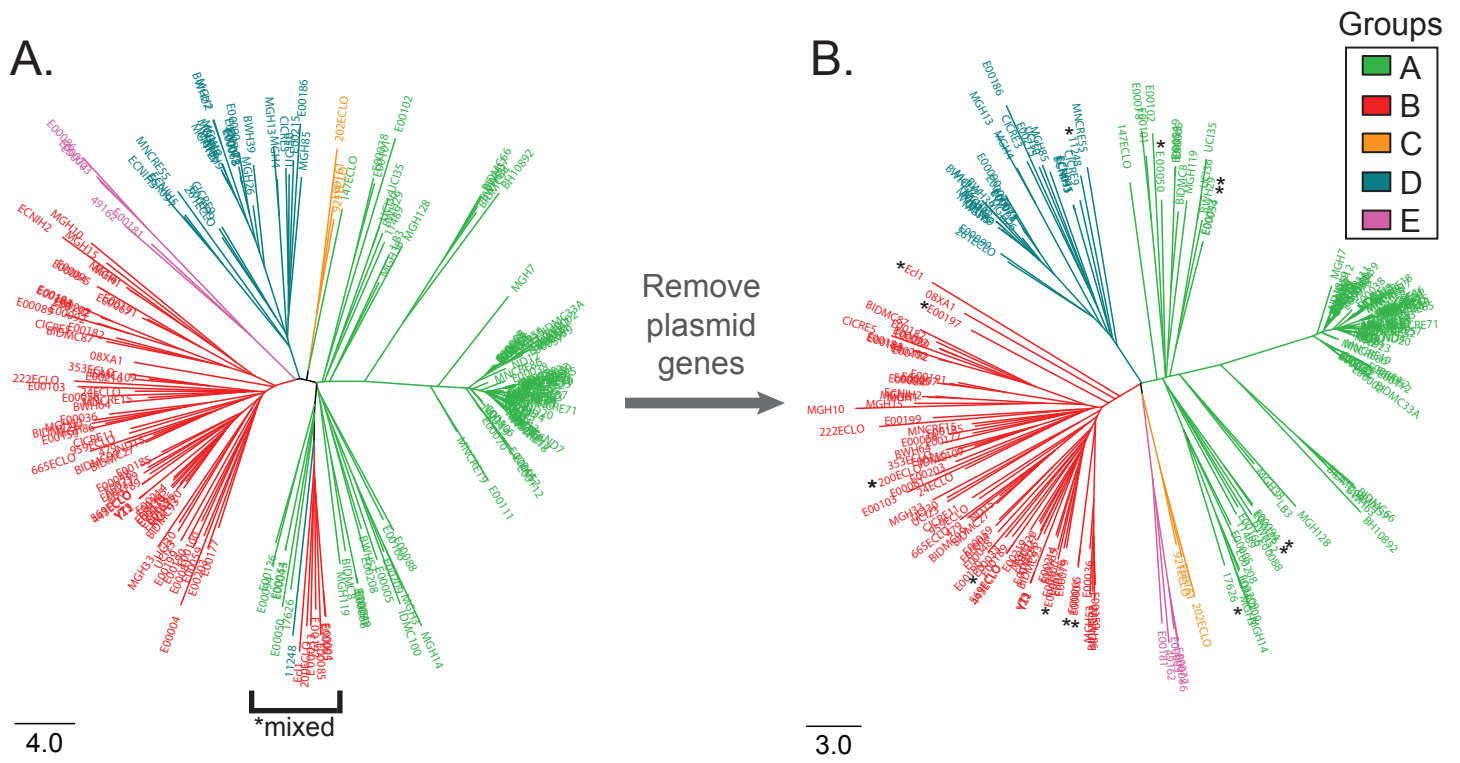

**Figure S3: Plasmid gene content can influence gene content tree topology.**

An unrooted Neighbor-Joining tree was constructed by Neighbor (83, 84) using the PanOCT Jaccard pairwise distance matrix of orthologous gene clusters with (A) and without plasmid genes (B). Coloring is by assigned *Enterobacter cloacae* complex groupings A-E (see key and Fig. 5). Nodes are labeled by strain name. The asterisk marks those branches of the tree with mixed group assignments prior to the removal of clusters containing known plasmid genes from the complete genomes used in the pan-genome analysis. The scale bar indicates distance.
