# Supplementary material for: Comprehensive Genome Analysis of Carbapenemase-Producing Enterobacter spp.: New Insights into Phylogeny, Population Structure, and Resistance Mechanisms
Source: PubMed Central journal article supplement (PMC5156309; doi:10.1128/mbio.02093-16), 2016-12-13
Supplement: mbo006163111sf4.pdf [file mbo006163111sf4.pdf]

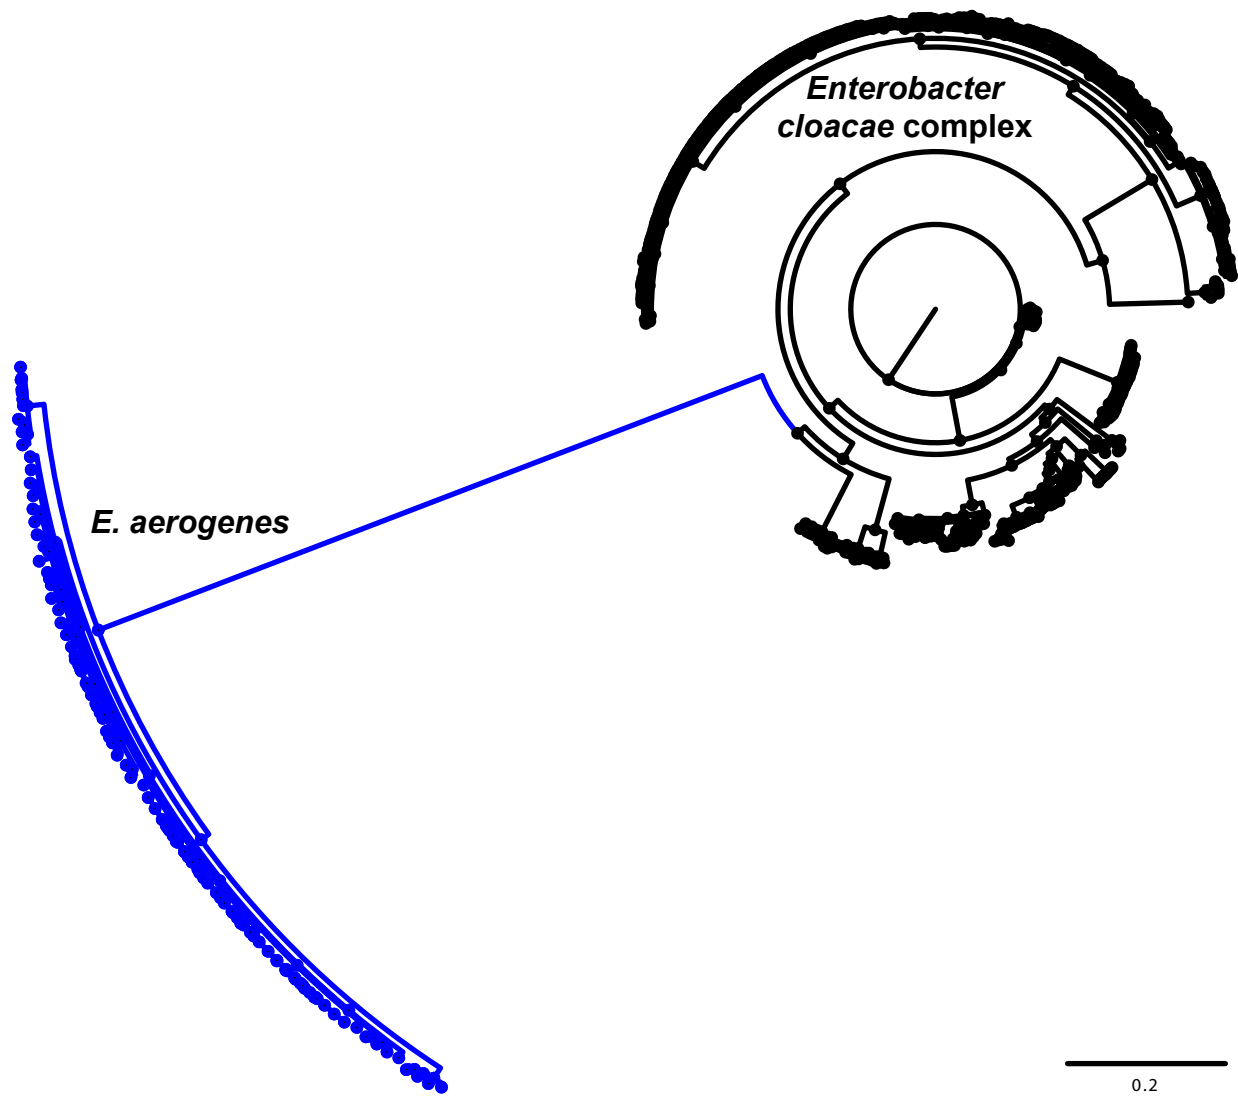

**Figure S4. Phylogenetic SNP tree of *Enterobacter* genomes.**

A whole genome core SNP tree was constructed for 447 *Enterobacter* spp. genomes using kSNP (30) and RaXML (31) (see Methods). The dendrogram was generated using FigTree v1.4.2 (<http://tree.bio.ed.ac.uk/software/figtree/>). This dataset included genomes within the 379 *E. cloacae* complex (black) and 68 *E. aerogenes* (blue). The scale bar indicates the number of nucleotide substitutions.
